# Supplementary material for: Discharge communication study: a realist evaluation of discharge communication experiences of patients, general practitioners and hospital practitioners, alongside a corresponding discharge letter sample
Source: PubMed Central journal article supplement (PMC8296817; doi:10.1136/bmjopen-2020-045465), 2021-07-21
Supplement: bmjopen-2020-045465supp001.pdf [file bmjopen-2020-045465supp001.pdf]

| No. of letters selected              | Patient name (to be removed during redaction) | Patient Unique research ID (to be added during redaction) | Categorisation ( <b>Unsuccessful</b> OR <b>successful</b> discharge letter example) | Reason for selection & categorisation (e.g. any key good or bad points about letter)                     |
|--------------------------------------|-----------------------------------------------|-----------------------------------------------------------|-------------------------------------------------------------------------------------|----------------------------------------------------------------------------------------------------------|
| <i>EXAMPLE</i><br>(Before redaction) | <i>Mr Joe Smith</i>                           |                                                           | <i>Unsuccessful</i>                                                                 | <i>Bad points: Medication alterations poorly outlined and information given to patient not explained</i> |
| (after redaction)                    | ██████████                                    | <i>P0001</i>                                              | <i>Unsuccessful</i>                                                                 |                                                                                                          |
| 1                                    |                                               |                                                           |                                                                                     |                                                                                                          |
| 2                                    |                                               |                                                           |                                                                                     |                                                                                                          |
| 3                                    |                                               |                                                           |                                                                                     |                                                                                                          |

*More rows to be added as needed...*

\*This grid has been previously published <sup>(1)</sup> under a CC-BY license and has been re-produced here for ease of reference for readers.

1. Weetman K, Spencer R, Dale J, *et al*. What makes a “successful” or “unsuccessful” discharge letter? Hospital clinician and General Practitioner assessments of the quality of discharge letters. *BMC Health Services Research*. 2021;21(1):349. <https://doi.org/10.1186/s12913-021-06345-z> [Accessed: 18/05/21].
