# Supplementary material for: Discharge communication study: a realist evaluation of discharge communication experiences of patients, general practitioners and hospital practitioners, alongside a corresponding discharge letter sample
Source: PubMed Central journal article supplement (PMC8296817; doi:10.1136/bmjopen-2020-045465), 2021-07-21
Supplement: bmjopen-2020-045465supp006.pdf [file bmjopen-2020-045465supp006.pdf]

**Table of Developed CMOCs (context, mechanism, outcomes configurations)**

| <b>CMOC</b> | <b>Context</b>                                                                                                                                                         | <b>Mechanism</b>                                                                                      | <b>Outcome</b>                                                                                         | <b>Effect assessment</b> | <b>Does it "work" or not?</b> |
|-------------|------------------------------------------------------------------------------------------------------------------------------------------------------------------------|-------------------------------------------------------------------------------------------------------|--------------------------------------------------------------------------------------------------------|--------------------------|-------------------------------|
| CMOC1       | patient not offered letter                                                                                                                                             | patient feels less involved in care                                                                   | reduced patient autonomy                                                                               | negative                 | does not work                 |
| CMOC2       | patient offered opportunity to receive letter(s)/patient choice respected                                                                                              | patient feels more informed and involved in care                                                      | increased patient autonomy and increased involvement of patients in treatment, care and communications | positive                 | does work                     |
| CMOC3       | large clear posters displaying patients right to choose and importance of correct contact information                                                                  | patient realises they should inform hospital of address changes and preferences                       | lowered risk of confidentiality breach                                                                 | positive                 | does work                     |
| CMOC4       | NHS drive for patient-led care (influence or context)                                                                                                                  | clinicians increasingly offering patient choice of receiving letter/sharing information with patients | increased patient empowerment                                                                          | positive                 | does work                     |
| CMOC5       | clinician views letters to patients are beneficial e.g. increases transparency, compliance, trust, patient satisfaction, patient understanding and recall              | clinician feels patient should be offered letter                                                      | potential increase in patient autonomy & satisfaction                                                  | positive                 | does work                     |
| CMOC6       | Clinicians views letters to patients as not beneficial e.g. letter not comprehensible to patient, medico-legal issues, increased cost and staff workload, patient harm | clinician feels patient should not be offered letter                                                  | no patient autonomy                                                                                    | N/A                      | unclear                       |

| CMOC   | Context                                                                                                                                                                                       | Mechanism                                                                            | Outcome                                                                                                                                                       | Effect assessment | Does it "work" or not? |
|--------|-----------------------------------------------------------------------------------------------------------------------------------------------------------------------------------------------|--------------------------------------------------------------------------------------|---------------------------------------------------------------------------------------------------------------------------------------------------------------|-------------------|------------------------|
|        | (anxiety, distress, and confusion) and issues around confidentiality                                                                                                                          |                                                                                      |                                                                                                                                                               |                   |                        |
| CMOC7  | NHS guidance that all hospital-GP correspondence should be copied to patient as a "right" where appropriate and if patients agree (unless risk of serious harm or legal issues)               | clinicians increasingly offering patient choice of receiving letter                  | increased use of NHS resources to send letters but patient benefits through increased understanding & potential reduction in patient queries (costs balanced) | positive          | does work              |
| CMOC8  | Data Protection Act 1998 (UK)                                                                                                                                                                 | Patients may become aware of their right to know what is written & stored about them | Patients informed of their stored electronic information (increased transparency)                                                                             | positive          | does work              |
| CMOC9  | doctor copies letters to patient                                                                                                                                                              | patient trusts doctor more                                                           | improved doctor-patient relationship                                                                                                                          | positive          | does work              |
| CMOC10 | patient offered choice of receiving letters                                                                                                                                                   | patient chooses to receive letters                                                   | Increased administrative staff workload and costs of printing & posting letters                                                                               | negative          | unclear                |
| CMOC11 | patient offered choice of receiving letters                                                                                                                                                   | patient chooses to receive letters                                                   | reduced queries and GP visits and reduced hospital re-admissions (limited evidence)                                                                           | positive          | does work              |
| CMOC12 | structured discharge letters written clearly in plain English (pref. 5th grade level) with medical jargon explained with lay terms, no value judgements of patients and minimal abbreviations | patients understand letter                                                           | increased patient knowledge                                                                                                                                   | positive          | does work              |

| <b>CMOC</b> | <b>Context</b>                                                                                                                                                           | <b>Mechanism</b>                                                | <b>Outcome</b>                                                                          | <b>Effect assessment</b> | <b>Does it "work" or not?</b> |
|-------------|--------------------------------------------------------------------------------------------------------------------------------------------------------------------------|-----------------------------------------------------------------|-----------------------------------------------------------------------------------------|--------------------------|-------------------------------|
| CMOC13      | doctors provided training in letter writing & record keeping (contextual influence) leading to doctors write letters of higher quality and more appropriate for patients | patients understand letter                                      | Increased patient knowledge/potential increase in doctor confidence in letter writing   | positive                 | does work                     |
| CMOC14      | patient preference for letter copies acknowledged and patient offered choice of receiving letter                                                                         | patients feel able to express their preference                  | decreased strain on resources & increased patient autonomy & satisfaction               | positive                 | does work                     |
| CMOC15      | patient provided written & verbal information to include sufficient counselling                                                                                          | patient reflects on written record of information for reference | increased patient knowledge of care plan, recall and acceptance of illness or condition | positive                 | does work                     |
| CMOC16      | Human Rights Act (1998) and Race Revelations Act (2000) - clinicians equally offer all patients letter copies regardless of background                                   | clinician feels all patients should be offered letter           | increased equality and accessibility of information to patients                         | positive                 | does work                     |
| CMOC17      | Use of pictures/pictographs/cartoons with written information                                                                                                            | patients understand letter                                      | Patient benefits from improved understanding e.g. adherence to agreed care plan         | positive                 | does work                     |
| CMOC18      | verbal information only                                                                                                                                                  | patient may not be able to retain information                   | reduced patient recall                                                                  | negative                 | does not work                 |
| CMOC19      | professionals who are not involved/limited involvement with patient writes letter                                                                                        | professional does not understand patient plan                   | letter quality reduced/increased risk of harm                                           | negative                 | does not work                 |
| CMOC20      | patient hospital visit of sensitive nature and/or patient lacks capacity e.g. psychotic episode, dementia                                                                | patient finds letter distressing and/or confusing               | harm to patient                                                                         | negative                 | does not work                 |

| <b>CMOC</b> | <b>Context</b>                                                                                                         | <b>Mechanism</b>                                                    | <b>Outcome</b>                                                                                           | <b>Effect assessment</b> | <b>Does it "work" or not?</b> |
|-------------|------------------------------------------------------------------------------------------------------------------------|---------------------------------------------------------------------|----------------------------------------------------------------------------------------------------------|--------------------------|-------------------------------|
| CMOC21      | Patient letter written above patient educational level or in a language the patient does not read                      | patient finds letter difficult to understand                        | patient is confused with no increased knowledge of care/possible misinterpretation of care instructions  | negative                 | does not work                 |
| CMOC22      | letter contains inaccurate information                                                                                 | patient identifies inaccuracies                                     | patient notifies hospital/GP of inaccuracies and corrections are made leading to improved record keeping | positive                 | does work                     |
| CMOC23      | patient receives discharge letter                                                                                      | patient does not understand entirety of letter                      | patient sources answers (internet, GP, friend or relative)                                               | positive                 | does work                     |
| CMOC24      | Patient specific letter sent to patient                                                                                | patient finds letter clear                                          | improved patient comprehension                                                                           | positive                 | does work                     |
| CMOC25      | Patient specific letter sent to patient                                                                                | Clinician produces two letters                                      | increased staff workload and costs                                                                       | negative                 | does not work                 |
| CMOC26      | Patient specific letter sent to patient                                                                                | Patient identifies information sent to GP and patient is different  | medico-legal concerns could be raised over letter discrepancies and any withheld information             | negative                 | does not work                 |
| CMOC27      | hospital sends patient discharge letter without verifying patient contact details without notifying patient            | hospital worker does not identify and correct incorrect information | potential breach of patient confidentiality                                                              | negative                 | does not work                 |
| CMOC28      | hospital routinely checks patient addresses and sends discharge letters to patient marked confidential using full name | hospital worker identifies and corrects incorrect information       | patient receives letter, minimal risk of patient confidentiality breach                                  | positive                 | does work                     |
| CMOC29      | patient receives discharge letter                                                                                      | patient may feel they have questions relating to letter             | patient contacts health provider with queries (evidence suggests minimal impact and queries)             | positive                 | unclear                       |

| <b>CMOC</b> | <b>Context</b>                                                                               | <b>Mechanism</b>                                                                                            | <b>Outcome</b>                                                                                                                 | <b>Effect assessment</b> | <b>Does it "work" or not?</b> |
|-------------|----------------------------------------------------------------------------------------------|-------------------------------------------------------------------------------------------------------------|--------------------------------------------------------------------------------------------------------------------------------|--------------------------|-------------------------------|
| CMOC30      | discharge letter/summary dictated in front of patient                                        | patient queries any inaccuracies                                                                            | letter less likely to contain inaccuracies                                                                                     | positive                 | does work                     |
| CMOC31      | Hospital gives patient letter to deliver to GP                                               | patient may find they are unable to make delivery or patient does not like being asked to perform this task | GP does not always receive letter. Patient satisfaction low.                                                                   | negative                 | does not work                 |
| CMOC32      | Patient receives letter not written at appropriate level for them                            | patient does not understand letter                                                                          | patient feels confused and dissatisfied with discharge care                                                                    | negative                 | does not work                 |
| CMOC33      | Patient has anxiety that doctors talk about things behind their backs                        | patient who receives letter feels reassured that there is no hidden information                             | decreased patient anxiety and improved doctor-patient relationship through transparency                                        | positive                 | does work                     |
| CMOC34      | patient receives discharge letter                                                            | Patient feels they are important to clinician                                                               | patient is impressed with letter and feels clinician has an interest                                                           | positive                 | does work                     |
| CMOC35      | choice about whether letter is sent to patient                                               | clinician feels letters would be a disaster and inappropriate for patient                                   | patient does not receive letter(s)                                                                                             | N/A                      | unclear                       |
| CMOC36      | patient receives discharge letter                                                            | Patient feels indifferent                                                                                   | no impact on patient                                                                                                           | N/A                      | unclear                       |
| CMOC37      | patient receives discharge letter with bad news                                              | Patient finds letter initially distressing                                                                  | letter causes initial distress but final outcome that patient finds letter helpful and aids recall and acceptance of condition | positive                 | does work                     |
| CMOC38      | letter sent to patient containing information not discussed with patient or abnormal results | patient feels distressed and anxious reading letter                                                         | patient harm/unethical practice                                                                                                | negative                 | does not work                 |
| CMOC39      | patient worried about diagnosis and receives letter                                          | patient understanding helped by letter                                                                      | patient feels less anxious due to being more informed                                                                          | positive                 | does work                     |

| <b>CMOC</b> | <b>Context</b>                                                       | <b>Mechanism</b>                               | <b>Outcome</b>                                                                                                                                                                                        | <b>Effect assessment</b> | <b>Does it "work" or not?</b> |
|-------------|----------------------------------------------------------------------|------------------------------------------------|-------------------------------------------------------------------------------------------------------------------------------------------------------------------------------------------------------|--------------------------|-------------------------------|
| CMOC40      | patient preference for letter copies not acknowledged                | Patient dissatisfied to have received letter   | decreased patient satisfaction                                                                                                                                                                        | negative                 | does not work                 |
| CMOC41      | patient offered choice of receiving letters (opt out)                | patient enabled to decide on letter preference | patient may or may not receive letter depending on their preference in relation to the particular care episode resulting in higher patient satisfaction. Increased rate of patients receiving letters | positive                 | does work                     |
| CMOC42      | patient who feels copies of letters are not necessary for themselves | Patient pleased not to be given letter         | patient satisfied, secondary outcomes: costs and time saved                                                                                                                                           | positive                 | does work                     |
| CMOC43      | patient receives discharge letter where appropriate                  | patient understands letter                     | patient finds letter informative and helpful. Patient wellbeing boosted and supported                                                                                                                 | positive                 | does work                     |
| CMOC44      | patient receives discharge letter where appropriate                  | patient feels involved in care plan            | patient ensures follow up plan is followed and books any necessary tests etc.                                                                                                                         | positive                 | does work                     |
| CMOC45      | patient receives discharge letter where appropriate                  | patient feels letter is important              | letter forms permanent record of hospital visit and kept for future reference. Patient may show letter to family and friends.                                                                         | positive                 | does work                     |
| CMOC46      | patient receives discharge letter for breaking good news             | patient reminded of discussion                 | patient feels reassured and has "peace of mind"                                                                                                                                                       | positive                 | does work                     |
| CMOC47      | patient receives discharge letter where appropriate (patient choice) | patient likes receiving letter                 | patient satisfaction increased                                                                                                                                                                        | positive                 | does work                     |
| CMOC48      | patient receives copy of discharge letter where appropriate          | patient becomes aware of what GP knows         | Patient reassured that GP knows about visit                                                                                                                                                           | positive                 | does work                     |

| <b>CMOC</b> | <b>Context</b>                                                                                | <b>Mechanism</b>                                                                                     | <b>Outcome</b>                                                                                                                             | <b>Effect assessment</b> | <b>Does it "work" or not?</b> |
|-------------|-----------------------------------------------------------------------------------------------|------------------------------------------------------------------------------------------------------|--------------------------------------------------------------------------------------------------------------------------------------------|--------------------------|-------------------------------|
| CMOC49      | Tickbox/template allows letter copies to patients to be monitored and audit trailed           | HP becomes aware of practice of copying patients letters                                             | Increased practice of patients receiving letters. Inconsistencies can be monitored for improving uptake.                                   | positive                 | Does work                     |
| CMOC50      | Letter acts as record of consultation and given to patient                                    | Patient reminded of consultation                                                                     | Patient recall increased and no need for patient to remember all consultation information                                                  | positive                 | Does work                     |
| CMOC51      | Letter acts as record of consultation and given to patient                                    | Patient prompted to use letter for administrative proceedings without need to contact GP or hospital | Letters can be used as proof of illness for benefit receipt, government support, disability applications and allowances, or time off work. | positive                 | Does work                     |
| CMOC52      | Patient episode of care due to repeat or ongoing condition                                    | Patient feels already informed about condition                                                       | Patient chooses not to receive letter preserving resources                                                                                 | positive                 | Does work                     |
| CMOC53      | Patient receives letter with irrelevant or poorly phrased social disease or behaviour details | Patient feels judged and upset                                                                       | Patient reflects on episode of care poorly and wellbeing negatively impacted                                                               | negative                 | Does not work                 |
| CMOC54      | Letter provided to patient with additional patient information section                        | Patient understands summary                                                                          | Patient knowledge increased and patient reassured that the important content points have been communicated.                                | positive                 | Does work                     |
| CMOC55      | Clinician concern about patient understanding letter                                          | Patient feels they do understand letter                                                              | Clinician concerns potentially unfounded. Patient values receiving letter                                                                  | positive                 | Does work                     |
